# Supplementary material for: The Chemokine CXCL16 Is a New Biomarker for Lymph Node Analysis of Colon Cancer Outcome
Source: MDPI journal article supplement (doi:10.3390/ijms20225793), 2019-11-18
Supplement: s1 [file s1]

**A**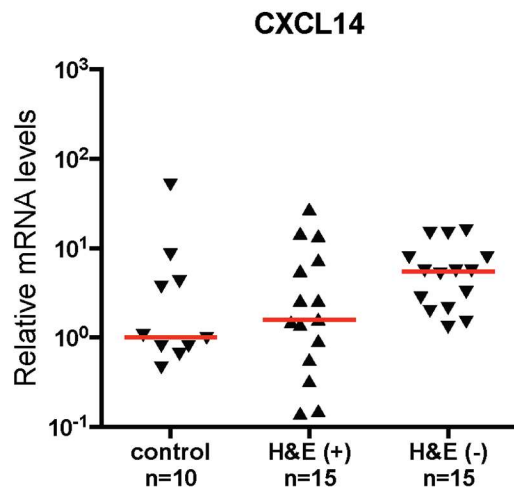**B**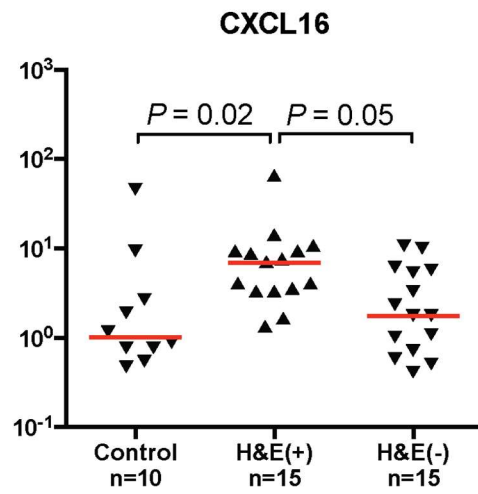

**Supplementary Figure 1.** Relative mRNA levels of (A) CXCL14 and (B) CXCL16 in a panel of 30 lymph nodes from 28 CC patients and 10 lymph nodes from 10 control patients. P-values were calculated by Kruskal–Wallis non-parametric ANOVA followed by a post hoc Dunn’s test for multiple comparisons test. Red lines indicate median values.
